# Supplementary material
Source: publisher figshare collection journal article supplement (https://acs.figshare.com/ndownloader/files/5148439)
Supplement: Supplementary file 1 [file 5148439]

# Electron Transfer Through H-bonded Peptide Assemblies

Heinz-Bernhard Kraatz,\* Irene Bediako-Amoa, Samuel H. Gyepi-Garbrah and Todd. C. Sutherland

Department of Chemistry, University of Saskatchewan, 110 Science Place, Saskatoon, Saskatchewan,  
CANADA S7N 5C9. kraatz@skyway.usask.ca

## Supporting Information

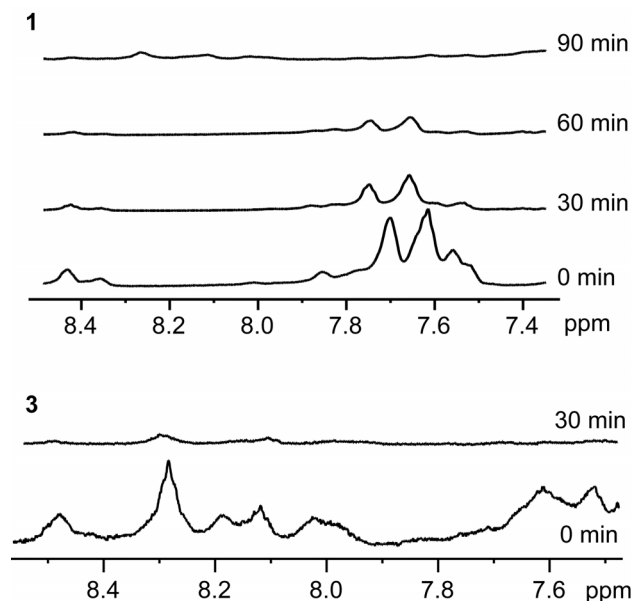

**Figure 1.** Expanded portion of the Amide A region showing exchange of N-H signal due to for Fc-peptide conjugates **1** and **3**. A drop of D<sub>2</sub>O was added to CDCl<sub>3</sub> solutions of **1** and **3**. For **1**, the H/D exchanged occurred at room temperature over a 90 minute period. Whereas, peptides **2** and **3** required heating of the sample at 58 °C for 30 minutes to obtain complete H/D exchange.

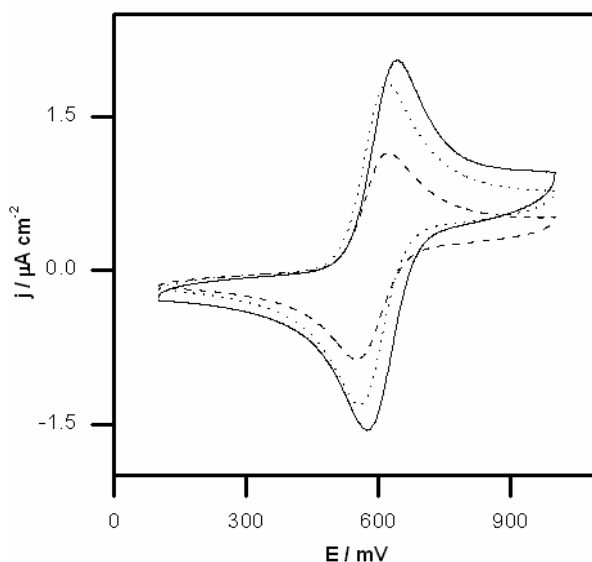

**Figure 2.** Solution electrochemistry of Fc-Peptides **1** - **3** in 0.1 M TBAP/CH<sub>3</sub>CN at a Scan rate of 100 mV·s<sup>-1</sup> **1** (—), **2** (---), **3** (···).

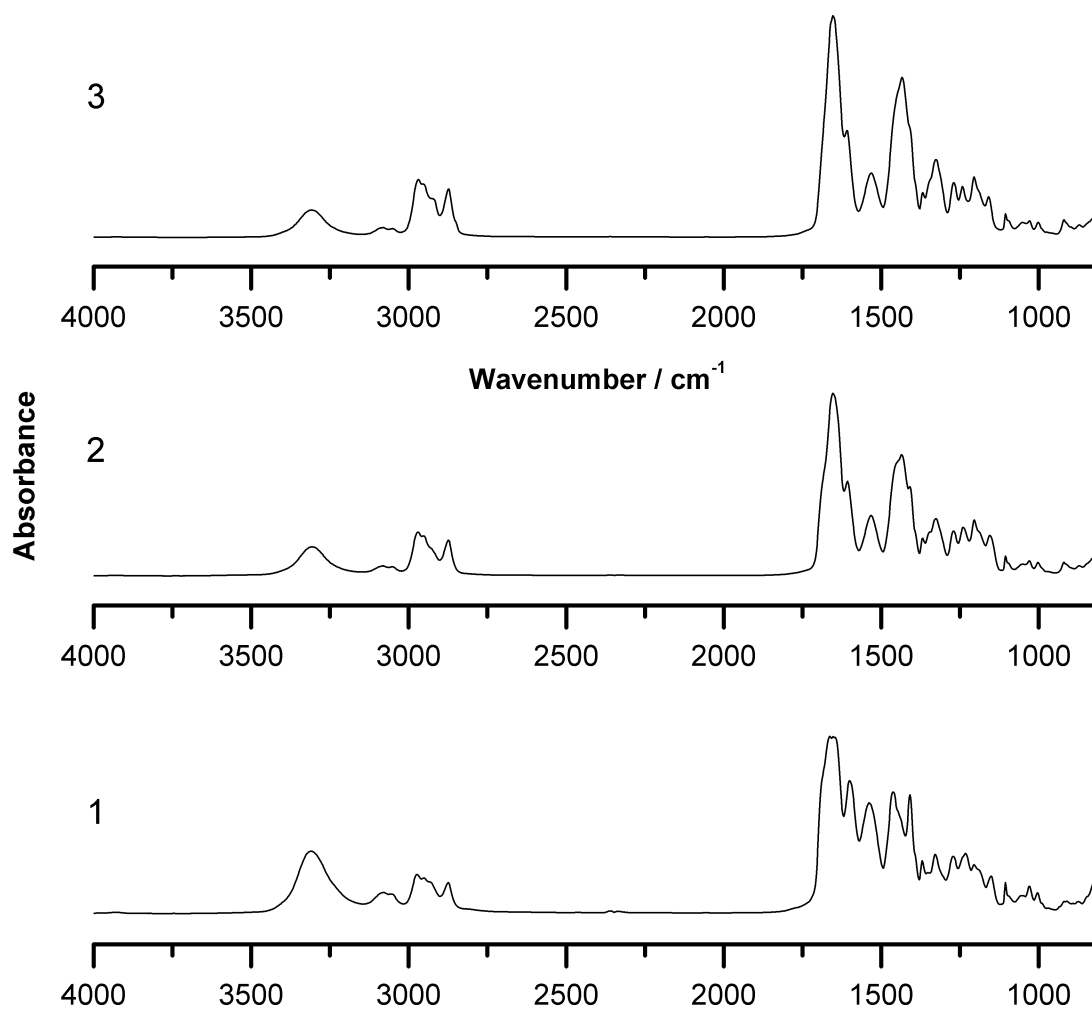

Figure 3. IR spectra (KBr) of peptide **1** – **3**.

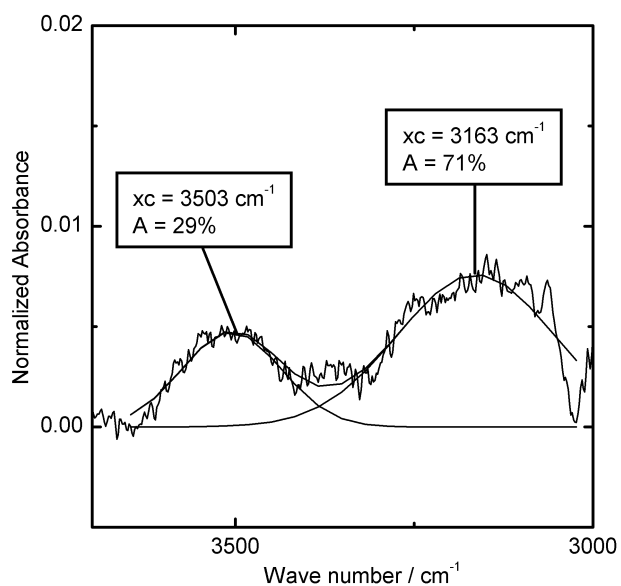

Figure 4. RAIRS of the Amide A region of **1**.

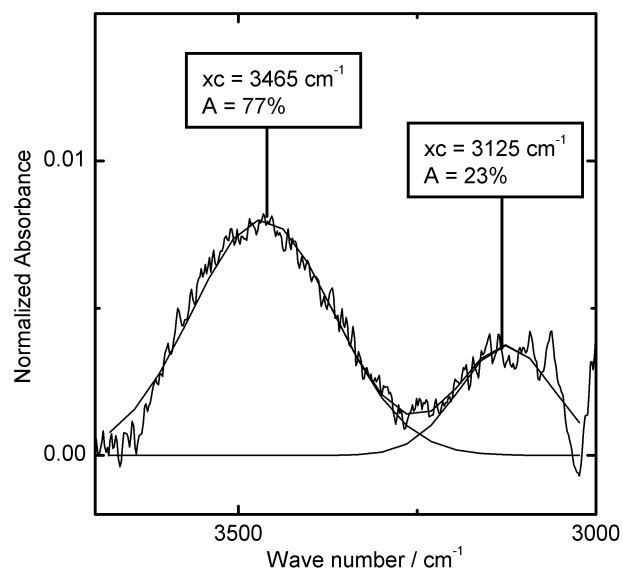

Figure 5. RAIRS of the Amide A region of **2**.

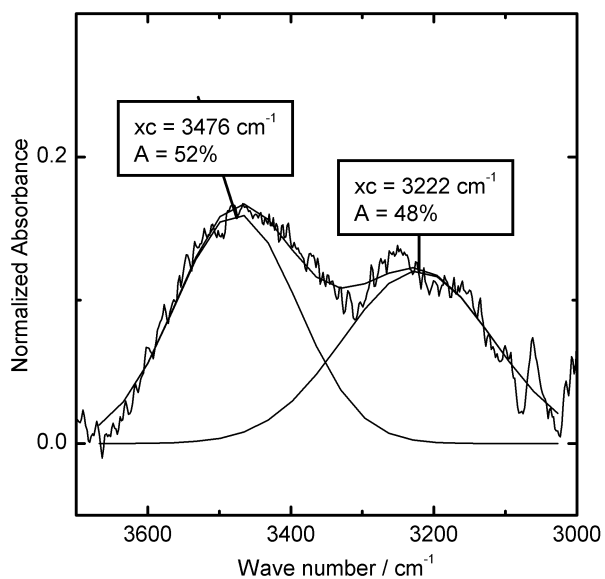

Figure 6. RAIRS of the Amide A region of **3**.

*Peptide tilt angles calculation by RAIRS.*

$$D_{obs} = \frac{I_1}{I_2} = C \left( \frac{2 \left[ \frac{1}{2} (3 \cos^2 \gamma - 1) \bullet \frac{1}{2} (3 \cos^2 \theta_1 - 1) \right] + 1}{2 \left[ \frac{1}{2} (3 \cos^2 \gamma - 1) \bullet \frac{1}{2} (3 \cos^2 \theta_2 - 1) \right] + 1} \right) \quad (1)$$

$D_{obs}$  represents the observed ratio of Amide I and Amide II absorbances and  $\gamma$ ,  $\theta_i$  and  $C$ , the tilt angle of the peptide axis from the surface normal, the angle between the transition moment (amide I amide II) and the helix axis, and the scaling constant, respectively. In case of helical peptides the transition moment from the helix axis is reported as  $39^\circ$  of  $\theta_1$  and  $75^\circ$  of  $\theta_2$ , respectively.<sup>1,2</sup> The scaling factor,  $C$ , can be determined from the ratio of Amide I and Amide II absorbance in a KBr pellet as an approximation of a random orientation. As reported in the literature<sup>3</sup> for peptidic monolayers the scaling factor is approximated to 1.5.<sup>4-6</sup>

*Collagen melting temperature determination.*

Fc-peptides **1**, **2** and **3** were fit to the following general sigmoid curve shape using the following formula:

$$y = A_2 + \frac{A_1 - A_2}{1 + e^{-(x - x_c)/dx}}$$

where  $A_2$  is the fully H-bonded system and  $A_1$  is the melted peptide.  $dx$  is a parameter that accommodates the steepness of the sigmoid and  $x_c$  is the melting temperature. Residuals were minimized using the Levenberg-Marquardt algorithm built into Origin 7.0 (OriginLab Corporation, Northampton, MA, USA).

Table 1. Parameters from CV of the Concentrated and Mixed Monolayers of Fc-peptides in 2 M NaClO<sub>4</sub> H<sub>2</sub>O/D<sub>2</sub>O.

| Compound             | $\Delta E$ (mV)  |                  | $\Delta E_{\text{fwhm}}$ (mV) |                  |
|----------------------|------------------|------------------|-------------------------------|------------------|
|                      | H <sub>2</sub> O | D <sub>2</sub> O | H <sub>2</sub> O              | D <sub>2</sub> O |
| <b>1</b>             | 35 (10)          | 60 (18)          | 145 (8)                       | 126 (16)         |
| <b>2</b>             | 40 (7)           | 40 (15)          | 140 (12)                      | 110 (10)         |
| <b>3</b>             | 45 (10)          | 40 (15)          | 150 (15)                      | 110 (10)         |
| <b>1<sup>a</sup></b> | 40 (12)          | 30 (10)          | 125 (15)                      | 95 (5)           |
| <b>2<sup>a</sup></b> | 36 (15)          | 25 (10)          | 120 (20)                      | 110 (10)         |
| <b>3<sup>a</sup></b> | 40 (10)          | 50 (11)          | 130 (10)                      | 128 (15)         |

<sup>a</sup> mixed monolayers of Fc-Peptides using hexanethiol

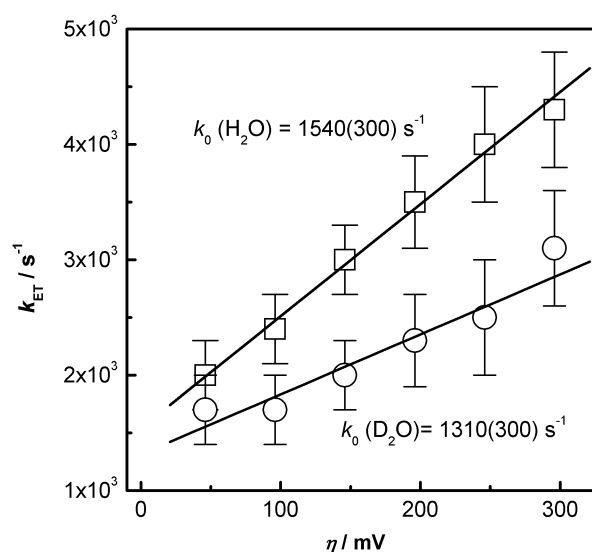

Figure 7. CA results for the calculation of  $k_{\text{ET}}$  for compound **3** in H<sub>2</sub>O and D<sub>2</sub>O.

**Impedance CNLS fitting:** The curve fitting was done using ZSimpWin software (v2.00). All parameters were permitted to float during the curve fitting process. The resultant model chosen (see Figure 4 of main text) has a  $\chi^2$  value of 0.002 on a typical data set. Of course inclusion of additional parameters resulted in a slightly lower  $\chi^2$  value (~0.001). However, we have chosen to follow the general rule that addition of a parameter should result in a 10 fold decrease in  $\chi^2$  value. Equivalent circuit models that contained 4 or fewer parameters resulted in an 8-15 fold increase in  $\chi^2$  value.

## References

- (1) Tsuboi, M. *J. Polym. Sci.* **1965**, *59*, 139.
- (2) Kimura, S.; Miura, Y.; Morita, T.; Kobayashi, S.; Imanashi, Y. *J. Polym. Sci. Part A: Polym. Chem.* **2000**, *38*, 4826.
- (3) Worley, C. G.; Linton, R. W.; Samulski, R. W. *Langmuir* **1995**, *11*, 3805.
- (4) Miura, Y.; Kimura, S. *Langmuir* **1999**, *15*, 1155.
- (5) Erniequez, E. P.; Gray, K. H.; Guarisco, V. F.; Linton, R. W.; Mar, K. D.; Samulski, E. T. *J. Vac. Sci. Technol.* **1992**, *10*, 2775.
- (6) Miura, Y.; Kimura, S.; Kobayashi, S.; Imanashi, Y.; Uemura, J. *Biopolymers* **2000**, *55*, 391.
